# Supplementary material for: Paediatric Enteric Fever in Brussels: a case series over 16 years
Source: Research Square preprint supplement (doi:10.21203/rs.3.rs-553247/v1), 2021-07-29
Supplement: Supplementary file 1 [file 797446169aab67a57bc1edf6.docx]

**Appendix 2. Most prominent clinical and biological findings in patients with a complicated course**

| **Age, gender, place of travel/contact** | **Time since travel, contact to endemic areas** | **Symptoms** | **Diagnosis at admission** | **Complications** | **Admission CRP (mg/l)** | **Positive Blood Cultures over**  **Total blood cultures** | ***Salmonella* Strain** | **Eosinophil count**(103 /µL) | **Hospital stay (days)** | **Nr of consultations** |
| --- | --- | --- | --- | --- | --- | --- | --- | --- | --- | --- |
| Female, 11, participated in a wedding with many people from Marocco | 7 days | Fever, malaise, headaches, black tongue, gastrointestinal symptoms | Suspected sepsis | Hemophagocytosis, ICU admission | 132 | ¾ | *Salmonella* ser. Typhi | 0 | 8 | 3 |
| Female, 10, went in the same wedding as the previous patient | 7 days | Fever, vomiting diarrhea, abdominal pain | Acute renal failure | Renal failure, Hepatitis, | 161 | 1/1 | *Salmonella* ser. Typhi | 0 | 9 | 2 |
| Male, 7 years, travelled to India.G6PD | Fever started during the journey | Fever, diarrhea, vomiting and abdominal pain | Haemolytic anaemia | Hemolytic anaemia due to G6PD deficiency, ICU admission | 36 | ¾ | *Salmonella* ser. Typhi | 0 | 11 | 2 |
|  |  |  |  |  |  |  |  |  |  |  |
| Male ,2 years moved from Guinee. Sickle cell disease | 17 days | Fever,malaise | Fever in a sickle cell disease patient | Multifocal osteo-myelitis | 11 | 0*/3 | *Salmonella* ser. Parayphi *C* | 350 | 23 | 3 |
| Male, 2 years, healthy ,travelled to Pakistan | Upon arrival | Fever,rash, diarrhea, vomiting abdominal pain | Febrile gastroenteritis | Cholecystitis, intussusception | 9 | 1/1 | *Salmonella* ser. Typhi | 0 | 10 | 2 |
| Male 7 years, healthy, symptoms started went at an African feast. | 2 Days | Fever, malaise, headaches, abdominal pain | Fever without focus | Ileitis | 38 | 3 /5 | *Salmonella* ser. Typhi | 0 | 10 | 4 |
| Male, 1 year healthy  Traveled to Uganda | 5 days | Fever, cough, diarrhoea, malaise | Atypical febrile seizures | Complex febrile seizures | 44 | 1/1 | *Salmonella* ser. Typhi | 60 | 8 | 2 |
| Female, 7, HIV positive, moved recently from Rwanda | 17 days | Fever, malaise, headaches, gastrointestinal symptoms | Febrile gastroenteritis | Severe nonresponding hyponatriemia | 400 | ½ | *Salmonella* ser. Typhi | 0 | 19 | 2 |

* The patient had a positive culture of bone drainage and was admitted three times for failure of oral treatment and recurrent osteomyelitis
